# Supplementary material for: Cryo-EM structures of PP2A:B55–FAM122A and PP2A:B55–ARPP19
Source: PubMed Central journal article supplement (PMC10765524; doi:10.1038/s41586-023-06870-3), 2023-12-20
Supplement: 41586_2023_6870_MOESM1_ESM.pdf [file 41586_2023_6870_MOESM1_ESM.pdf]

## Supplementary information

---

# Cryo-EM structures of PP2A:B55–FAM122A and PP2A:B55–ARPP19

---

In the format provided by the  
authors and unedited

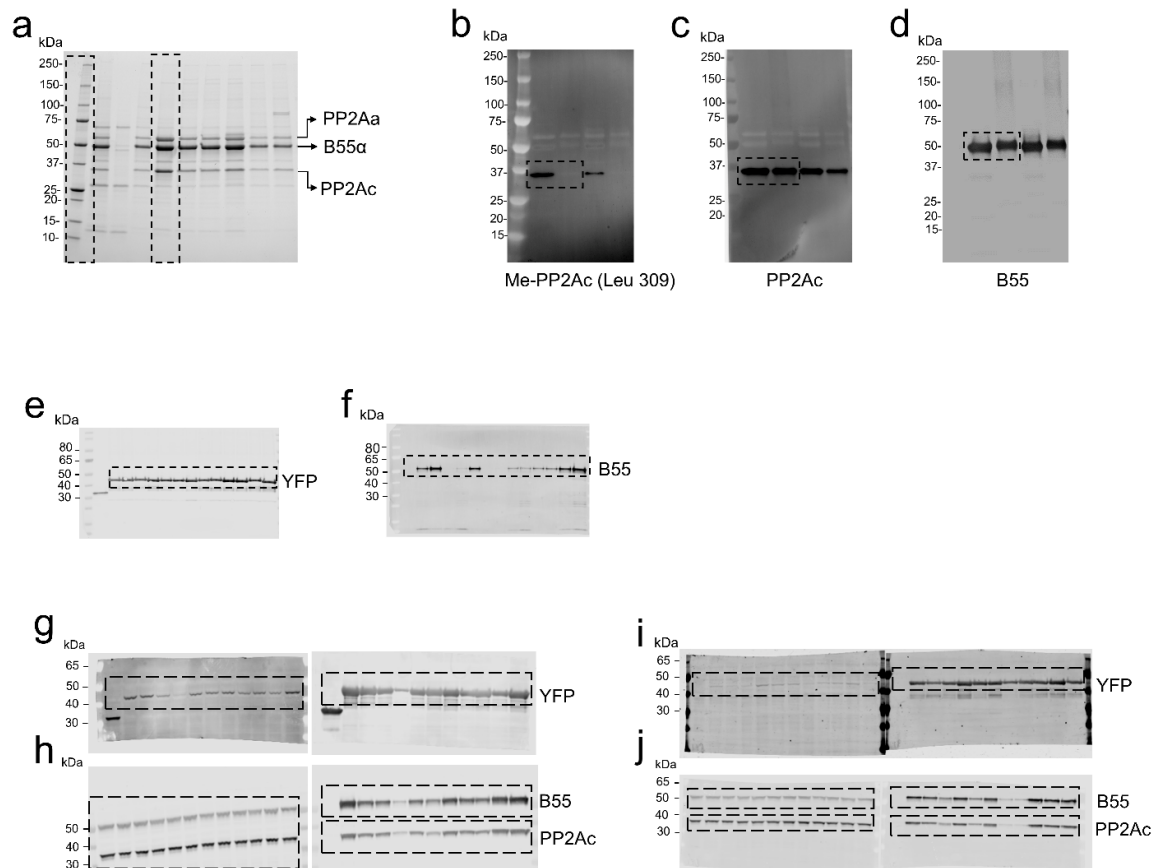

**Supplementary Fig. 1. Uncropped western blot images. a-d. Refer to Extended Data Fig. 1c.** See legend and panel in Extended Data Fig. 1c for lane identifiers. Proteins were detected by western blotting, using the indicated antibodies. Bands shown in Extended Data Fig. 1c are indicated by a dashed line box. **e-f. Refer to Fig. 3b.** See legend and panel in Fig. 3b for lane identifiers. Proteins were detected by western blotting, using the indicated antibodies. Bands shown in Fig. 3b are indicated by a dashed line box. **g-j. Refers to Fig. 3e and Extended Data Fig. 9e-g.** See legend and panel in Fig. 3e and Extended Data Fig. 9e-g for lane identifiers. Proteins were detected by western blotting, using the indicated antibodies. Bands shown in Fig. 3e and Extended Data Fig. 9e-g are indicated by a dashed line box. Molecular weight markers (kDa) shown.

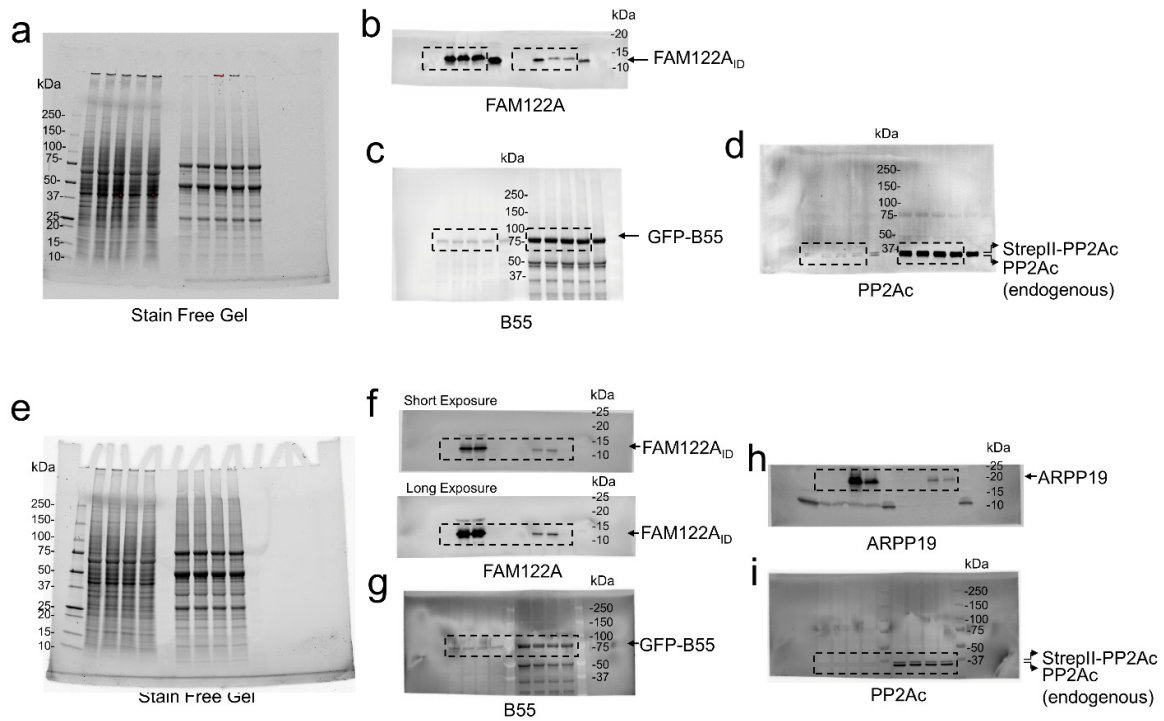

**Supplementary Fig. 2. Uncropped gel and western blot images. a-d. Refers to Fig 4h.** Stain-free SDS-PAGE gel (**a**) used for Western blots (**b-d**). See legend and panel in 4h for lane identifiers. Proteins were detected by western blotting, using the indicated antibodies. Bands shown in Fig. 4h indicated by a dashed line box. **e-i. Refers to Extended Data Fig. 10d.** Stain-free SDS-PAGE (**e**) used for Western blots (**f-i**). See legend and panel in Extended Data Fig. 13d for lane identifiers. Proteins were detected by western blotting, using the indicated antibodies. Bands shown in Extended Data Fig. 10d indicated by a dashed line box. Molecular weight markers (kDa) shown.

**Supplementary Table 1. Cryo-EM data collection, refinement and validation statistics**

|                                                      | PP2A:B55-FAM122A                                   |                                                             |                                                  | PP2A:B55- <i>tp</i> ARPP19<br>(EMDB: EMD-41604)<br>(PDB: 8TTB) |
|------------------------------------------------------|----------------------------------------------------|-------------------------------------------------------------|--------------------------------------------------|----------------------------------------------------------------|
|                                                      | B55 body<br>(EMDB:<br>EMD-41667)<br>(PDB:<br>8TWE) | Catalytic<br>body<br>(EMDB:<br>EMD-41668)<br>(PDB:<br>8TWI) | Consensus<br>(EMDB:<br>EMD-40644)<br>(PDB: 8SO0) |                                                                |
| <b>Data collection and processing</b>                |                                                    |                                                             |                                                  |                                                                |
| Magnification                                        | 81,000x                                            | 81,000x                                                     | 81,000x                                          | 105,000x                                                       |
| Voltage (kV)                                         | 300                                                | 300                                                         | 300                                              | 300                                                            |
| Electron exposure (e <sup>-</sup> /Å <sup>2</sup> )  | 70                                                 | 70                                                          | 70                                               | 70                                                             |
| Defocus range (μm)                                   | -2.53 to -0.55                                     | -2.53 to -0.55                                              | -2.33 to -0.56                                   | -2.60 to -0.40                                                 |
| Pixel size (Å)                                       | 1.068                                              | 1.068                                                       | 1.068                                            | 0.827                                                          |
| Symmetry imposed                                     | C1                                                 | C1                                                          | C1                                               | C1                                                             |
| Initial particle images (no.)                        | 1,248,538                                          | 1,248,538                                                   | 1,248,538                                        | 1,170,216                                                      |
| Final particle images (no.)                          | 103,522                                            | 103,522                                                     | 25,000                                           | 52,934                                                         |
| Map resolution (Å)                                   | 2.55                                               | 2.69                                                        | 2.80                                             | 2.77                                                           |
| FSC threshold                                        | FSC = 0.143                                        | FSC = 0.143                                                 | FSC = 0.143                                      | FSC = 0.143                                                    |
| Map resolution range (Å)                             | 4.58 to 2.48                                       | 4.02 to 2.68                                                | 5.96 to 2.75                                     | 5.14 to 2.71                                                   |
| <b>Refinement</b>                                    |                                                    |                                                             |                                                  |                                                                |
| Initial model used (PDB)                             | 3DW8                                               |                                                             |                                                  | 3DW8                                                           |
| Model resolution (Å)                                 | 2.61                                               | 3.12                                                        | 2.86                                             | 2.81                                                           |
| FSC threshold                                        | FSC = 0.5                                          | FSC = 0.5                                                   | FSC = 0.5                                        | FSC = 0.5                                                      |
| Map sharpening <i>B</i> factor (Å <sup>2</sup> )     | -52.965                                            | -71.906                                                     | -32.336                                          | -57.838                                                        |
| Model composition                                    |                                                    |                                                             |                                                  |                                                                |
| Non-hydrogen atoms                                   | 6683                                               | 4073                                                        | 10756                                            | 11002                                                          |
| Protein residues                                     | 833                                                | 510                                                         | 1343                                             | 1376                                                           |
| Ligands                                              | None                                               | ZN:1<br>FE:1                                                | ZN:1<br>FE:1                                     | ZN:1<br>FE:1                                                   |
| <i>B</i> factors (Å <sup>2</sup> )<br>(min/max/mean) |                                                    |                                                             |                                                  |                                                                |
| Protein                                              | 27.60/179.51/<br>89.51                             | 33.76/188.61/<br>121.80                                     | 8.88/155.34/<br>78.91                            | 41.46/188.26/<br>86.61                                         |
| Ligand                                               | N/A                                                | 162.24/187.03/<br>174.63                                    | 113.84/135.82/<br>124.83                         | 98.59/113.27/<br>105.93                                        |
| R.m.s. deviations                                    |                                                    |                                                             |                                                  |                                                                |
| Bond lengths (Å)                                     | 0.003                                              | 0.002                                                       | 0.002                                            | 0.002                                                          |
| Bond angles (°)                                      | 0.463                                              | 0.460                                                       | 0.400                                            | 0.398                                                          |
| Validation                                           |                                                    |                                                             |                                                  |                                                                |
| MolProbity score                                     | 0.81                                               | 0.88                                                        | 0.95                                             | 1.15                                                           |
| Clashscore                                           | 1.05                                               | 1.24                                                        | 1.87                                             | 3.65                                                           |
| Poor rotamers (%)                                    | 0                                                  | 0                                                           | 0                                                | 0                                                              |
| Ramachandran plot                                    |                                                    |                                                             |                                                  |                                                                |
| Favored (%)                                          | 99.51                                              | 97.82                                                       | 98.11                                            | 98.30                                                          |
| Allowed (%)                                          | 0.49                                               | 2.18                                                        | 1.89                                             | 1.70                                                           |
| Disallowed (%)                                       | 0                                                  | 0                                                           | 0                                                | 0                                                              |
