# Supplementary material for: Cryo-EM structures of PP2A:B55–FAM122A and PP2A:B55–ARPP19
Source: PubMed Central journal article supplement (PMC10765524; doi:10.1038/s41586-023-06870-3), 2023-12-20
Supplement: 41586_2023_6870_MOESM2_ESM.pdf [file 41586_2023_6870_MOESM2_ESM.pdf]

## Reporting Summary

Nature Portfolio wishes to improve the reproducibility of the work that we publish. This form provides structure for consistency and transparency in reporting. For further information on Nature Portfolio policies, see our [Editorial Policies](#) and the [Editorial Policy Checklist](#).

### Statistics

For all statistical analyses, confirm that the following items are present in the figure legend, table legend, main text, or Methods section.

| n/a                                 | Confirmed                                                                                                                                                                                                                                                                                      |
|-------------------------------------|------------------------------------------------------------------------------------------------------------------------------------------------------------------------------------------------------------------------------------------------------------------------------------------------|
| <input type="checkbox"/>            | <input checked="" type="checkbox"/> The exact sample size ( $n$ ) for each experimental group/condition, given as a discrete number and unit of measurement                                                                                                                                    |
| <input type="checkbox"/>            | <input checked="" type="checkbox"/> A statement on whether measurements were taken from distinct samples or whether the same sample was measured repeatedly                                                                                                                                    |
| <input checked="" type="checkbox"/> | <input type="checkbox"/> The statistical test(s) used AND whether they are one- or two-sided<br><i>Only common tests should be described solely by name; describe more complex techniques in the Methods section.</i>                                                                          |
| <input checked="" type="checkbox"/> | <input type="checkbox"/> A description of all covariates tested                                                                                                                                                                                                                                |
| <input type="checkbox"/>            | <input checked="" type="checkbox"/> A description of any assumptions or corrections, such as tests of normality and adjustment for multiple comparisons                                                                                                                                        |
| <input type="checkbox"/>            | <input checked="" type="checkbox"/> A full description of the statistical parameters including central tendency (e.g. means) or other basic estimates (e.g. regression coefficient) AND variation (e.g. standard deviation) or associated estimates of uncertainty (e.g. confidence intervals) |
| <input checked="" type="checkbox"/> | <input type="checkbox"/> For null hypothesis testing, the test statistic (e.g. $F$ , $t$ , $r$ ) with confidence intervals, effect sizes, degrees of freedom and $P$ value noted<br><i>Give <math>P</math> values as exact values whenever suitable.</i>                                       |
| <input checked="" type="checkbox"/> | <input type="checkbox"/> For Bayesian analysis, information on the choice of priors and Markov chain Monte Carlo settings                                                                                                                                                                      |
| <input checked="" type="checkbox"/> | <input type="checkbox"/> For hierarchical and complex designs, identification of the appropriate level for tests and full reporting of outcomes                                                                                                                                                |
| <input checked="" type="checkbox"/> | <input type="checkbox"/> Estimates of effect sizes (e.g. Cohen's $d$ , Pearson's $r$ ), indicating how they were calculated                                                                                                                                                                    |

*Our web collection on [statistics for biologists](#) contains articles on many of the points above.*

### Software and code

Policy information about [availability of computer code](#)

|                 |                                                                                                                                                                                                                                                                                                                                     |
|-----------------|-------------------------------------------------------------------------------------------------------------------------------------------------------------------------------------------------------------------------------------------------------------------------------------------------------------------------------------|
| Data collection | Bruker Topspin 4.1.3, Clariostar Mars 3.42, SerialEM 3.8, Image Lab Touch Software 2.4                                                                                                                                                                                                                                              |
| Data analysis   | GraphPad Prism 9.5, CARA 1.8.4.2, CcPNMR 2.5.2, NMRFARM SPARKY 1.47, SigmaPlot 14.5, Microsoft® Excel® for Microsoft 365 MSO (Version 2301 Build 16.0.16026.20002) 64-bit; Relion 4, ChimeraX 1.3, Coot 0.9.2, Image Lab Touch Software 2.4, ImageJ 1.53t, Topaz 0.2, Isolde, Phenix 1.20, GraphPad Prism 9.5, Bruker Topspin 4.1.3 |

For manuscripts utilizing custom algorithms or software that are central to the research but not yet described in published literature, software must be made available to editors and reviewers. We strongly encourage code deposition in a community repository (e.g. GitHub). See the Nature Portfolio [guidelines for submitting code & software](#) for further information.

### Data

Policy information about [availability of data](#)

All manuscripts must include a [data availability statement](#). This statement should provide the following information, where applicable:

- Accession codes, unique identifiers, or web links for publicly available datasets
- A description of any restrictions on data availability
- For clinical datasets or third party data, please ensure that the statement adheres to our [policy](#)

BMRB: 51828, 51682, 51881, 51882; PDB: 8SO0, 8TTB, 8TWE, 8TW1; EMD-40644, EMD-41604, EMD-41667, EMD-41668. The source data underlying figures and tables are provided as a Source Data file and on Figshare (10.6084/m9.figshare.23992656)

## Research involving human participants, their data, or biological material

Policy information about studies with [human participants or human data](#). See also policy information about [sex, gender \(identity/presentation\), and sexual orientation](#) and [race, ethnicity and racism](#).

|                                                                    |     |
|--------------------------------------------------------------------|-----|
| Reporting on sex and gender                                        | N/A |
| Reporting on race, ethnicity, or other socially relevant groupings | N/A |
| Population characteristics                                         | N/A |
| Recruitment                                                        | N/A |
| Ethics oversight                                                   | N/A |

Note that full information on the approval of the study protocol must also be provided in the manuscript.

## Field-specific reporting

Please select the one below that is the best fit for your research. If you are not sure, read the appropriate sections before making your selection.

Life sciences       Behavioural & social sciences       Ecological, evolutionary & environmental sciences

For a reference copy of the document with all sections, see [nature.com/documents/nr-reporting-summary-flat.pdf](https://www.nature.com/documents/nr-reporting-summary-flat.pdf)

## Life sciences study design

All studies must disclose on these points even when the disclosure is negative.

|                 |                                                                                                                                                                                                                                 |
|-----------------|---------------------------------------------------------------------------------------------------------------------------------------------------------------------------------------------------------------------------------|
| Sample size     | SDS-PAGE, western blot and fluorescence based assays were done with an independent n=2 to 6 and showed to have excellent reproducibility; mean +/- STD was used for statistical analysis as commonly used for these techniques. |
| Data exclusions | No data was excluded in our analysis.                                                                                                                                                                                           |
| Replication     | All data was replicated at least twice in independent studies. Data was also collected from different protein expression/purification batches, i.e., not just technical replicates, but also experimental replicates.           |
| Randomization   | No randomization was necessary for our in vitro biochemical studies as sample bias is impossible due to the use of experimental replicates.                                                                                     |
| Blinding        | Blinding was not relevant for the study as no test subjects were used in this study. Furthermore no experimental grouping or randomization is required for this work.                                                           |

## Reporting for specific materials, systems and methods

We require information from authors about some types of materials, experimental systems and methods used in many studies. Here, indicate whether each material, system or method listed is relevant to your study. If you are not sure if a list item applies to your research, read the appropriate section before selecting a response.

### Materials & experimental systems

|                                     |                                                           |
|-------------------------------------|-----------------------------------------------------------|
| n/a                                 | Involvement in the study                                  |
| <input type="checkbox"/>            | <input checked="" type="checkbox"/> Antibodies            |
| <input type="checkbox"/>            | <input checked="" type="checkbox"/> Eukaryotic cell lines |
| <input checked="" type="checkbox"/> | <input type="checkbox"/> Palaeontology and archaeology    |
| <input checked="" type="checkbox"/> | <input type="checkbox"/> Animals and other organisms      |
| <input checked="" type="checkbox"/> | <input type="checkbox"/> Clinical data                    |
| <input checked="" type="checkbox"/> | <input type="checkbox"/> Dual use research of concern     |
| <input checked="" type="checkbox"/> | <input type="checkbox"/> Plants                           |

### Methods

|                                     |                                                 |
|-------------------------------------|-------------------------------------------------|
| n/a                                 | Involvement in the study                        |
| <input checked="" type="checkbox"/> | <input type="checkbox"/> ChIP-seq               |
| <input checked="" type="checkbox"/> | <input type="checkbox"/> Flow cytometry         |
| <input checked="" type="checkbox"/> | <input type="checkbox"/> MRI-based neuroimaging |

## Antibodies

|                 |                                                                                                                                                                                    |
|-----------------|------------------------------------------------------------------------------------------------------------------------------------------------------------------------------------|
| Antibodies used | Anti-B55α (PPP2R2A (2G9), Cell Signaling Technologies, Mouse mAb #5689, 1:2000)<br>Anti-B55α (PP2A B Subunit (100C1) Rabbit mAb, Cell Signaling Technologies, Cat # 2290S, 1:1000) |
|-----------------|------------------------------------------------------------------------------------------------------------------------------------------------------------------------------------|

Anti-PP2Ac alpha/beta (Clone 11H12, Mouse mAb, Millipore, Cat# MABE1783, Lot# Q3046542, 1:1000)  
 Anti-PP2Ac (Anti-PP2A Antibody, C subunit, clone 1D6, Millipore Sigma, Cat#05-421, 1:2000)  
 YFP (in-house generated, 1:5000)  
 Anti-PPP2R1A (Clone 6G3, Biolegend, Cat# 824901, 1:1000)  
 Anti-PP2Ac Methyl (Leu309) (Clone 2A10, Biolegend, Cat # 828801, Lot: B349332, 1:1000)  
 Anti-FAM122A (Clone 3E9, ThermoFisher Scientific, Cat# MA5-24510, 1:1000)  
 Anti-ARPP19 (Proteintech, Cat#11678-1-AP, 1:1000)  
 Goat anti-Rat IgG, DyLight 800 (ThermoFisher Scientific, Cat# SA5-10024, 1:3000)  
 Goat anti-Mouse IgG, StarBright Blue 700 (Bio-Rad, Cat# 12004158, 1:3000)  
 Goat anti-Rabbit IgG, StarBright Blue 520 (Bio-Rad, Cat# 12005869, 1:3000)

## Validation

All antibodies used in this study are commercially available and have been validated by the manufacturer and previous publications  
 Anti-B55 $\alpha$  ([https://www.cellsignal.com/products/primary-antibodies/ppp2r2a-2g9-mouse-mab/5689?\\_requestid=7384374](https://www.cellsignal.com/products/primary-antibodies/ppp2r2a-2g9-mouse-mab/5689?_requestid=7384374) PMID: 36781846, PMID: 35695070)  
 Anti-B55 $\alpha$  (<https://www.cellsignal.com/products/primary-antibodies/pp2a-b-subunit-100c1-rabbit-mab/2290>. PMID: 34911954, 34794320)  
 Anti-PP2Ac ([https://www.emdmillipore.com/US/en/product/Anti-PP2AC-alpha-beta-Antibody-clone-11H12,MM\\_NF-MABE1783-25UL](https://www.emdmillipore.com/US/en/product/Anti-PP2AC-alpha-beta-Antibody-clone-11H12,MM_NF-MABE1783-25UL).)  
 Anti-PP2Ac ([https://www.emdmillipore.com/US/en/product/Anti-PP2A-Antibody-C-subunit-clone-1D6,MM\\_NF-05-421](https://www.emdmillipore.com/US/en/product/Anti-PP2A-Antibody-C-subunit-clone-1D6,MM_NF-05-421). PMID: 26310906, PMID: 24618897)  
 Anti-PPP2R1A (<https://www.biolegend.com/en-us/clone-search?GroupID=&PageNum=69>. PMID: 9032296)  
 Anti-PP2Ac Methyl (Leu309) (<https://www.biolegend.com/en-us/products/purified-anti-pp2ac-methyl-leu-309-antibody-11522>. PMID: 31992581)  
 Anti-FAM122A (<https://www.thermofisher.com/antibody/product/FAM122A-Antibody-clone-3E9-Monoclonal/MA5-24510>. PMID: 33108758)  
 Anti-ARPP19 (<https://www.ptglab.com/products/ARPP-19-Antibody-11678-1-AP.htm>. PMID: 31717978, 32753897)  
 Goat anti-Rat IgG, DyLight 800 (<https://www.thermofisher.com/antibody/product/Goat-anti-Rat-IgG-H-L-Cross-Adsorbed-Secondary-Antibody-Polyclonal/SA5-10024>, PMID: 34376643, 36106016)  
 Goat anti-Mouse IgG, StarBright Blue 700 (<https://www.bio-rad.com/en-us/sku/12004158-starbright-blue-700-goat-anti-mouse-igg-400-ul?ID=12004158>. PMID: 36261268, 36056072)  
 Goat anti-Rabbit IgG, StarBright Blue 520 (<https://www.bio-rad-antibodies.com/polyclonal/rabbit-lapine-igg-antibody-120058.html?f=starbright%20blue%20520>. PMID: 37078570, 36261268, 34279219)  
 YFP antibody: bands of correct size recognized only upon expression of YFP tagged proteins. Used in Kruse et al EMBO J 2020 (PMID: 32400009) and Kruse Nat Commun 2021 (PMID: 34799561).

## Eukaryotic cell lines

Policy information about [cell lines and Sex and Gender in Research](#)

|                                                                   |                                                                                                |
|-------------------------------------------------------------------|------------------------------------------------------------------------------------------------|
| Cell line source(s)                                               | Expi293F were purchased from Thermo Scientific Cat# A14527. HeLa cells were from ATCC (CCL-2). |
| Authentication                                                    | No further authentication was performed                                                        |
| Mycoplasma contamination                                          | Cell lines were not tested for mycoplasma contamination                                        |
| Commonly misidentified lines (See <a href="#">ICLAC</a> register) | No commonly misidentified cell line was used in this study.                                    |
